# Supplementary material for: Efficacy of Fe3O4@polydopamine nanoparticle-labeled human umbilical cord Wharton's jelly-derived mesenchymal stem cells in the treatment of streptozotocin-induced diabetes in rats
Source: Royal Society of Chemistry journal article supplement (doi:10.1039/d0bm01076f), 2020-01-01
Supplement: d0bm01076f1.pdf [file d0bm01076f1.pdf]

## Supplemental materials

Efficacy of Fe<sub>3</sub>O<sub>4</sub>@polydopamine nanoparticle-labeled human umbilical cord Wharton's jelly-derived mesenchymal stem cells in the treatment of streptozotocin-induced diabetes in rats

*Xiuying Li<sup>1</sup>, Zhenhong Wei<sup>1</sup>, Liya Wu<sup>1</sup>, Huiying Lv<sup>1</sup>, Yucheng Zhang<sup>1</sup>, Jing Li<sup>1</sup>, Hua Yao<sup>1</sup>, Hao Zhang<sup>2</sup>, Bai Yang<sup>2</sup>, Xiaohua Xu<sup>3</sup>\*, Jinlan Jiang<sup>1</sup>\**

<sup>1</sup> Scientific Research Center, China-Japan Union Hospital of Jilin University, Changchun, Jilin, China

<sup>2</sup> State Key Laboratory of Supramolecular Structure and Materials, College of Chemistry, Jilin University, Changchun, Jilin, China

<sup>3</sup> Department of Nephrology, China-Japan Union Hospital of Jilin University, Changchun, Jilin, China

\* Correspondence:

<sup>1</sup> Scientific Research Center, China-Japan Union Hospital of Jilin University, No. 126 Xiantai Street, Changchun 130033, Jilin, China

<sup>3</sup> Department of Nephrology, China-Japan Union Hospital of Jilin University, No. 126 Xiantai Street, Changchun 130033, Jilin, China

Tel: +86 0431 84995423;

Fax: +86 0431 84995423;

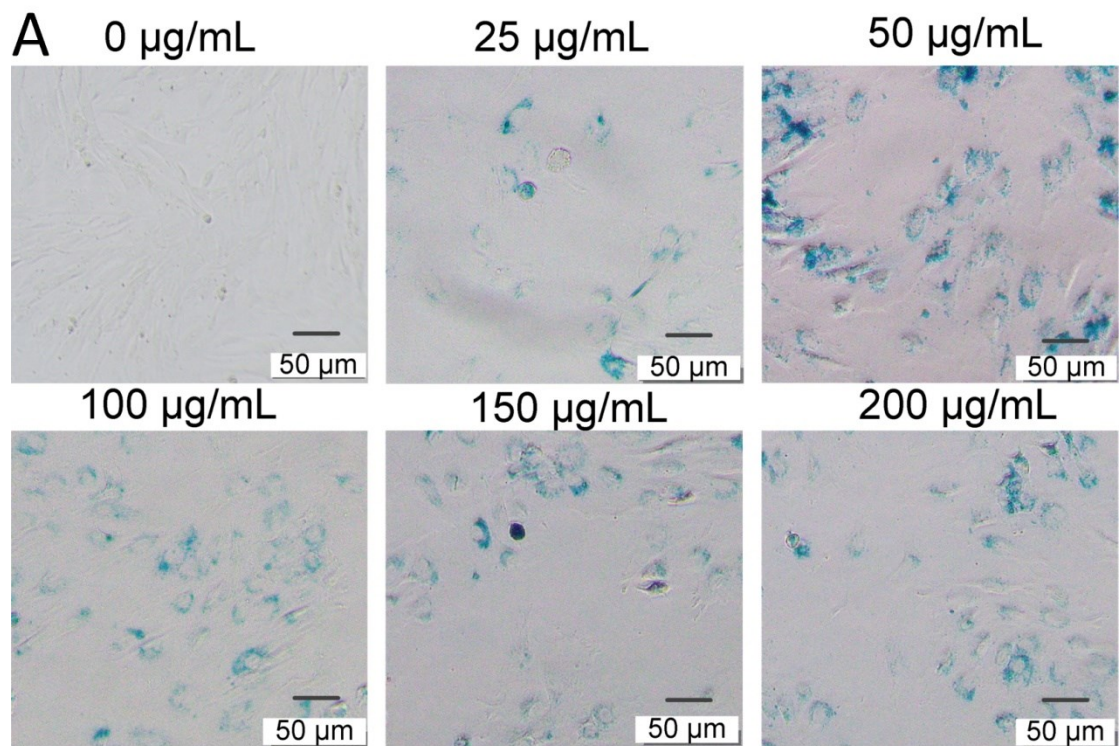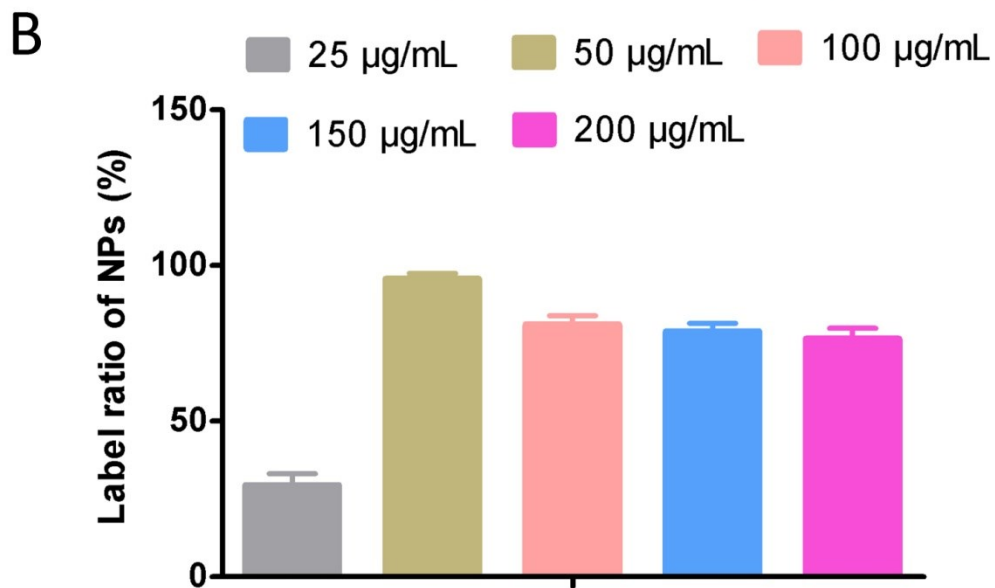

Figure S1. Verification of MSCs labeled with NPs. (A) Prussian blue iron staining of MSCs labeled with NPs. Scale bars: 50  $\mu\text{m}$ . (B) The labeling ratio of NPs in MSCs.
